# Supplementary material for: Solvent-assisted growth of Sb2Se3 nanocompounds from a single-source precursor under mild reaction conditions
Source: Royal Society of Chemistry journal article supplement (doi:10.1039/c1ce05032j), 2011-01-01
Supplement: c1ce05032j.pdf [file c1ce05032j.pdf]

## Supplementary information

### Solvent-assisted growth of $\text{Sb}_2\text{Se}_3$ nanocompounds from a single-source precursor under mild reaction conditions

*Nilkamal Maitit, Sang Hyuk Im, Yong Hui Lee, Chong-Hyeak Kim, and Sang Il SeoK*

KRICT-EPFL Global Research Laboratory Advanced Materials Division, Korea Research Institute of Chemical Technology, 19 Sinseongno, Yuseong, Daejeon, 305-600, Republic of Korea.

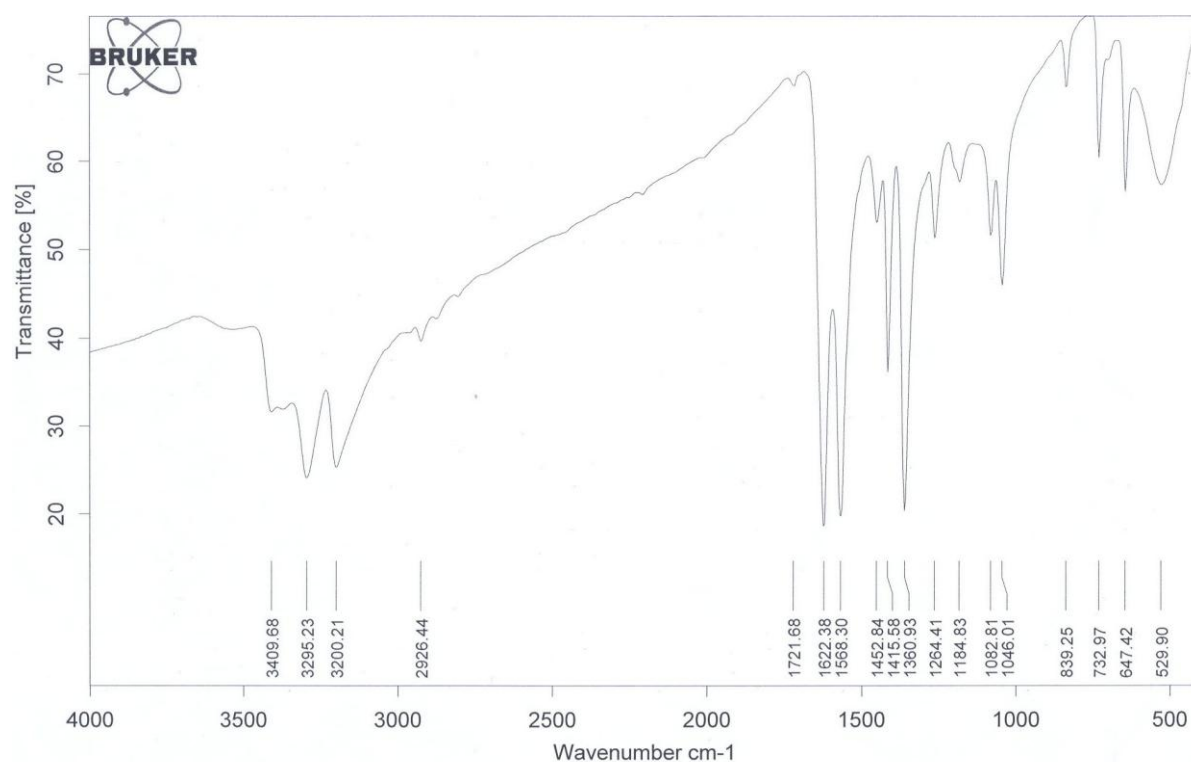

**Figure S1.** IR spectrum of **1**.

Print of window 80: MS Spectrum

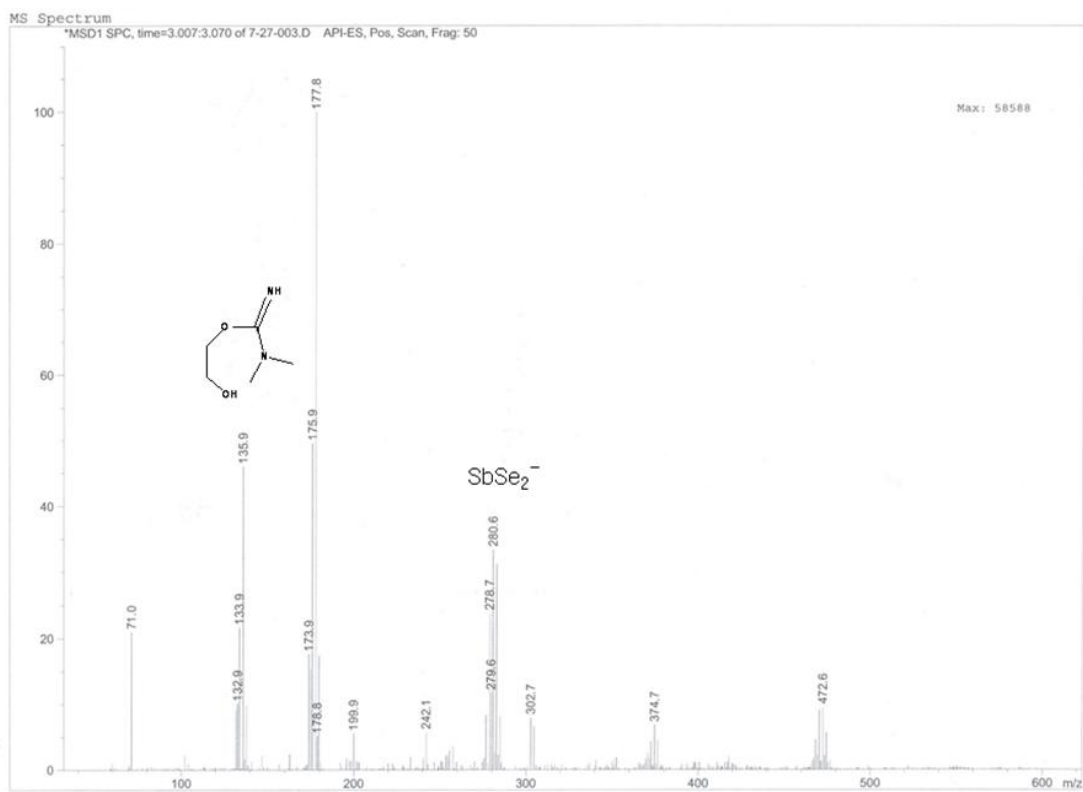

Instrument 1 7/27/2010 1:50:02 PM PGB

Page 1 of 1

**Figure S2.** Mass spectrum obtained during solvothermal process.
